# Supplementary material for: Epidemiology of viral acute lower respiratory infections in a community-based cohort of rural north Indian children
Source: PubMed Central journal article supplement (PMC6513504; doi:10.7189/jogh.09.010433), 2019-06
Supplement: jogh-09-010433-s001.pdf [file jogh-09-010433-s001.pdf]

## Appendix S1

## Case definitions for AURI and ALRI

| Clinical signs and symptoms                                                                                                                                                                                                                                                                                                                                                     | IMNCI/ IMAI Case definition                 | Study definition |
|---------------------------------------------------------------------------------------------------------------------------------------------------------------------------------------------------------------------------------------------------------------------------------------------------------------------------------------------------------------------------------|---------------------------------------------|------------------|
| <b>Age &lt;2months</b>                                                                                                                                                                                                                                                                                                                                                          |                                             |                  |
| <b>Any one of the following</b><br>Convulsions <b>OR</b><br>Not feeding well <b>OR</b><br>Fast breathing (60 breaths per minute or more) <b>OR</b><br>Severe chest indrawing <b>OR</b><br>Grunting <b>OR</b><br>Fever (37.5 C* or above) <b>OR</b><br>Low body temperature (less than 35.5 C*) <b>OR</b><br>Movements only when stimulated or no movements even when stimulated | <b>Possible Serious Bacterial Infection</b> | <b>ALRI</b>      |
| Insufficient signs for the above classification                                                                                                                                                                                                                                                                                                                                 |                                             | <b>AURI</b>      |
| <b>Age 2months - 59months</b>                                                                                                                                                                                                                                                                                                                                                   |                                             |                  |
| Any general danger sign (lethargic/unconscious/convulsion) <b>OR</b><br>Stridor in calm child <b>OR</b> Chest in-drawing                                                                                                                                                                                                                                                        | Severe Pneumonia or Very Severe Disease     | <b>ALRI</b>      |
| Fast breathing (2-12 months: 50 breaths per minute or more<br>12 months-59 months: 40 breaths or more)                                                                                                                                                                                                                                                                          | Pneumonia                                   | <b>ALRI</b>      |
| No signs of pneumonia or very severe disease                                                                                                                                                                                                                                                                                                                                    | No Pneumonia: Cough or Cold                 | <b>AURI</b>      |
| <b>Age 5 years – 10 years</b>                                                                                                                                                                                                                                                                                                                                                   |                                             |                  |
| <b>Any one or more of the following</b><br>Fast breathing (40 breaths per minute or more) <b>OR</b><br>High fever (38°C or above) <b>OR</b><br>Pulse rate ( $\geq$ 120 per minute) <b>OR</b><br>Lethargy <b>OR</b><br>Severe chest pain                                                                                                                                         | Severe Pneumonia or Very Severe Disease     | <b>ALRI</b>      |
| <b>Two of the following</b><br>Fast breathing (30 breaths per minute or more) <b>OR</b><br>Night sweats <b>OR</b><br>Chest pain                                                                                                                                                                                                                                                 | Pneumonia                                   | <b>ALRI</b>      |

|                                                 |                             |             |
|-------------------------------------------------|-----------------------------|-------------|
| Insufficient signs for the above classification | No pneumonia: Cough or cold | <b>AURI</b> |
|-------------------------------------------------|-----------------------------|-------------|
